# Supplementary material for: Internet-Based Cognitive Behavioral Therapy for Patients With Chronic Somatic Conditions: A Meta-Analytic Review
Source: PubMed Central journal article supplement (PMC4004147; doi:10.2196/jmir.2777), 2014-03-27
Supplement: jmir_v16i3e88_app2.pdf [file jmir_v16i3e88_app2.pdf]

Multimedia appendix 2. Study characteristics and post-intervention effects of ICBT for chronic somatic conditions: two-armed studies with a passive control condition.

| Author, year (population)                                     | Condition, N                  | Dropout n (%)                           | Treatment content (duration)                                                                                                                                                          | Outcome                         | Outcome measure <sup>a</sup>            | Between group effects <sup>b</sup> |                |
|---------------------------------------------------------------|-------------------------------|-----------------------------------------|---------------------------------------------------------------------------------------------------------------------------------------------------------------------------------------|---------------------------------|-----------------------------------------|------------------------------------|----------------|
| Abbott et al, 2009 [35]<br><br>(tinnitus)                     | ICBT, 32                      | Intervention<br>23/32 (72%)             | <b>ICBT (6 wks)</b><br>-applied relaxation<br>-cognitive therapy<br>-behavioral therapy<br>-psychoeducation<br>-improving coping skills                                               | <b>General psychological</b>    |                                         | ITT                                |                |
|                                                               |                               |                                         |                                                                                                                                                                                       | depression                      | DASS-D                                  | 0                                  |                |
|                                                               |                               |                                         |                                                                                                                                                                                       | anxiety                         | DASS-A                                  | 0                                  |                |
|                                                               |                               |                                         |                                                                                                                                                                                       | stress                          | DASS-S                                  | 0                                  |                |
|                                                               |                               | Measurement<br>32/56 (57%)              |                                                                                                                                                                                       | <b>Disease-related physical</b> |                                         |                                    |                |
|                                                               | tinnitus loudness             |                                         |                                                                                                                                                                                       | VAS                             | 0                                       |                                    |                |
|                                                               | quality of sleep              |                                         |                                                                                                                                                                                       | VAS                             | 0                                       |                                    |                |
|                                                               | <b>Disease-related impact</b> |                                         |                                                                                                                                                                                       |                                 |                                         |                                    |                |
|                                                               |                               | tinnitus-related distress and annoyance | TRQ                                                                                                                                                                                   | 0                               |                                         |                                    |                |
| Andersson et al, 2002 [37]<br><br>(tinnitus)                  | ICBT, 53                      | Intervention<br>26/53 (49%)             | <b>ICBT (6 wks)</b><br>-applied relaxation<br>-cognitive therapy<br>-behavioral therapy<br>-mindfulness & acceptance-based techniques<br>-psychoeducation<br>-improving coping skills | <b>General psychological</b>    |                                         | Non-ITT                            |                |
|                                                               |                               |                                         |                                                                                                                                                                                       | depression                      | HADS-D                                  | - <sup>e</sup>                     |                |
|                                                               |                               |                                         |                                                                                                                                                                                       | anxiety                         | HADS-A                                  | - <sup>e</sup>                     |                |
|                                                               |                               |                                         |                                                                                                                                                                                       | <b>Disease-related physical</b> |                                         |                                    |                |
|                                                               |                               | Measurement<br>45/117 (38%)             |                                                                                                                                                                                       | tinnitus loudness               | VAS                                     | - <sup>d</sup>                     |                |
|                                                               | quality of sleep              |                                         |                                                                                                                                                                                       | VAS                             | 0 <sup>c</sup>                          |                                    |                |
|                                                               | <b>Disease-related impact</b> |                                         |                                                                                                                                                                                       |                                 |                                         |                                    |                |
|                                                               |                               |                                         |                                                                                                                                                                                       |                                 | tinnitus-related distress and annoyance | TRQ                                | - <sup>e</sup> |
| van Bastelaar et al, 2011 [57]<br><br>(type 1 and 2 diabetes) | ICBT, 125                     | Intervention<br>72/125 (58%)            | <b>ICBT (8 wks)</b><br>-cognitive therapy<br>-applied relaxation<br>-behavioral therapy<br>-stress management<br>-improving coping skills                                             | <b>General psychological</b>    |                                         | ITT                                |                |
|                                                               |                               |                                         |                                                                                                                                                                                       | depression                      | CES-D                                   | - <sup>f</sup>                     |                |
|                                                               |                               |                                         |                                                                                                                                                                                       | <b>Disease-related physical</b> |                                         |                                    |                |
|                                                               |                               | Measurement<br>88/255 (35%)             |                                                                                                                                                                                       | glycemic control                | HbA1c                                   | <i>n.r.</i>                        |                |
|                                                               | <b>Disease-related impact</b> |                                         |                                                                                                                                                                                       |                                 |                                         |                                    |                |
|                                                               |                               |                                         |                                                                                                                                                                                       |                                 | diabetes-specific emotional distress    | PAID                               | - <sup>f</sup> |
| Berman et al, 2009 [38]<br><br>(chronic pain)                 | ICBT, 52                      | Intervention<br>10/52 (19%)             | <b>ICBT (6 wks)</b><br>-applied relaxation<br>-cognitive therapy (group)<br>-psychoeducation                                                                                          | <b>General psychological</b>    |                                         | Non-ITT                            |                |
|                                                               |                               |                                         |                                                                                                                                                                                       | depression                      | CES-D                                   | 0                                  |                |
|                                                               |                               |                                         |                                                                                                                                                                                       | anxiety                         | STAI-6                                  | 0                                  |                |
|                                                               |                               | Measurement<br>11/89 (12%)              |                                                                                                                                                                                       | <b>Disease-related physical</b> |                                         |                                    |                |
|                                                               |                               |                                         |                                                                                                                                                                                       |                                 | pain intensity                          | BPI                                | 0              |
|                                                               |                               |                                         |                                                                                                                                                                                       |                                 | <b>Disease-related impact</b>           |                                    |                |
|                                                               |                               | -                                       | -                                                                                                                                                                                     | -                               |                                         |                                    |                |

|                                                             |                               |                             |                                                                                                                                                                              |                                 |         |                |
|-------------------------------------------------------------|-------------------------------|-----------------------------|------------------------------------------------------------------------------------------------------------------------------------------------------------------------------|---------------------------------|---------|----------------|
| Brattberg, 2006 [39]<br><br>(chronic pain and/or burnout)   | ICBT, 30                      | Intervention<br>3/30 (10%)  | <b>ICBT (20 wks)</b><br>-cognitive therapy (group)<br>-psychoeducation                                                                                                       | <b>General psychological</b>    |         | Non-ITT        |
|                                                             | Waiting list, 30              | Measurement<br>5/60 (8%)    |                                                                                                                                                                              | depression                      | HADS-D  | - <sup>d</sup> |
|                                                             |                               |                             |                                                                                                                                                                              | anxiety                         | HADS-A  | 0              |
|                                                             |                               |                             |                                                                                                                                                                              | <b>Disease-related physical</b> |         |                |
|                                                             |                               |                             |                                                                                                                                                                              | bodily pain                     | SF-36   | - <sup>d</sup> |
|                                                             |                               |                             |                                                                                                                                                                              | <b>Disease-related impact</b>   |         |                |
| -                                                           | -                             | -                           |                                                                                                                                                                              |                                 |         |                |
| Burhman et al, 2004 [40]<br><br>(chronic back pain)         | ICBT, 22 <sup>b</sup>         | Intervention<br><i>n.r.</i> | <b>ICBT (6 wks)</b><br>-improving coping skills<br>-applied relaxation<br>-stress management<br>-cognitive therapy<br>-physical exercise<br>-psychoeducation                 | <b>General psychological</b>    |         | Non-ITT        |
|                                                             | Waiting list, 29 <sup>b</sup> | Measurement<br>5/56 (9%)    |                                                                                                                                                                              | depression                      | HADS-D  | 0              |
|                                                             |                               |                             |                                                                                                                                                                              | anxiety                         | HADS-A  | 0              |
|                                                             |                               |                             |                                                                                                                                                                              | affective distress              | MPI     | 0              |
|                                                             |                               |                             |                                                                                                                                                                              | <b>Disease-related physical</b> |         |                |
|                                                             |                               |                             |                                                                                                                                                                              | average pain intensity          | Diary   | 0              |
|                                                             |                               |                             |                                                                                                                                                                              | pain severity                   | MPI     | 0              |
|                                                             |                               |                             |                                                                                                                                                                              | <b>Disease-related impact</b>   |         |                |
| -                                                           | -                             | -                           |                                                                                                                                                                              |                                 |         |                |
| Burhman et al, 2011 [41]<br><br>(chronic back pain)         | ICBT, 26                      | Intervention<br>3/26 (12%)  | <b>ICBT (8 wks)</b><br>-applied relaxation<br>-cognitive therapy<br>-stress management<br>-improving coping skills<br>-mindfulness<br>-physical exercise<br>-psychoeducation | <b>General psychological</b>    |         | ITT            |
|                                                             | Waiting list, 28              | Measurement<br>4/54 (7%)    |                                                                                                                                                                              | depression                      | HADS-D  | 0              |
|                                                             |                               |                             |                                                                                                                                                                              | anxiety                         | HADS-A  | 0              |
|                                                             |                               |                             |                                                                                                                                                                              | affective distress              | MPI     | 0              |
|                                                             |                               |                             |                                                                                                                                                                              | <b>Disease-related physical</b> |         |                |
|                                                             |                               |                             |                                                                                                                                                                              | pain severity                   | MPI     | 0              |
|                                                             |                               |                             |                                                                                                                                                                              | <b>Disease-related impact</b>   |         |                |
|                                                             |                               |                             |                                                                                                                                                                              | -                               | -       | -              |
| David et al, 2011 [42]<br><br>(breast cancer)               | ICBT, 69                      | Intervention<br>37/69 (54%) | <b>ICBT (8 wks)</b><br>-psychoeducation<br>-cognitive therapy<br>-behavioral therapy<br>-stress management<br>-improving coping skills<br>-problem solving                   | <b>General psychological</b>    |         | Non-ITT        |
|                                                             | Waiting list, 64              | Measurement<br>63/133 (47%) |                                                                                                                                                                              | depression                      | BSI     | 0              |
|                                                             |                               |                             |                                                                                                                                                                              | anxiety                         | BSI     | 0              |
|                                                             |                               |                             |                                                                                                                                                                              | psychological distress          | BSI-GSI | 0              |
|                                                             |                               |                             |                                                                                                                                                                              | <b>Disease-related physical</b> |         |                |
|                                                             |                               |                             |                                                                                                                                                                              | -                               | -       | -              |
|                                                             |                               |                             |                                                                                                                                                                              | <b>Disease-related impact</b>   |         |                |
|                                                             |                               |                             |                                                                                                                                                                              | -                               | -       | -              |
| Devineni and Blanchard, 2005 [43]<br><br>(chronic headache) | ICBT, 39 <sup>b</sup>         | Intervention<br><i>n.r.</i> | <b>ICBT (4 wks)</b><br>-applied relaxation<br>-cognitive therapy<br>-stress management<br>-improving coping skills<br>-biofeedback                                           | <b>General psychological</b>    |         | Non-ITT        |
|                                                             | Waiting list, 47 <sup>b</sup> | Measurement<br>53/139 (38%) |                                                                                                                                                                              | depression                      | CES-D   | 0              |
|                                                             |                               |                             |                                                                                                                                                                              | anxiety                         | STAI-T  | 0              |
|                                                             |                               |                             |                                                                                                                                                                              | <b>Disease-related physical</b> |         |                |
|                                                             |                               |                             |                                                                                                                                                                              | headache index                  | Diary   | - <sup>t</sup> |
|                                                             |                               |                             |                                                                                                                                                                              | <b>Disease-related impact</b>   |         |                |
| -                                                           | -                             | -                           |                                                                                                                                                                              |                                 |         |                |

|                                                              |                                     |                                  |                                                                                                                                                                                  |                                   |          |                |
|--------------------------------------------------------------|-------------------------------------|----------------------------------|----------------------------------------------------------------------------------------------------------------------------------------------------------------------------------|-----------------------------------|----------|----------------|
| Hunt et al, 2009 [47]<br><br>(irritable bowel syndrome)      | ICBT, 28                            | Intervention<br>15/28 (54%)      | <b>ICBT (6 wks)</b><br>-applied relaxation<br>-stress management<br>-improving coping skills<br>-cognitive therapy<br>-behavioral therapy<br>-exposure<br>-psychoeducation       | <b>General psychological</b>      |          | Non-ITT        |
|                                                              |                                     |                                  |                                                                                                                                                                                  | -                                 | -        | -              |
|                                                              |                                     |                                  |                                                                                                                                                                                  | <b>Disease-related physical</b>   |          |                |
|                                                              | Waiting list (+self-monitoring), 26 | Measurement<br>23/54 (43%)       |                                                                                                                                                                                  | gastrointestinal symptom severity | GSRS     | - <sup>e</sup> |
|                                                              |                                     |                                  |                                                                                                                                                                                  | <b>Disease-related impact</b>     |          |                |
|                                                              |                                     | disease-specific quality of life | IBS-QOL                                                                                                                                                                          | + <sup>d</sup>                    |          |                |
| Ljótsson et al, 2010 [50]<br><br>(irritable bowel syndrome)  | ICBT, 43                            | Intervention<br>13/43 (30%)      | <b>ICBT (10 wks)</b><br>-exposure<br>-mindfulness & acceptance-based techniques<br>-cognitive therapy<br>-behavioral therapy<br>-psychoeducation                                 | <b>General psychological</b>      |          | ITT            |
|                                                              |                                     |                                  |                                                                                                                                                                                  | depression                        | MADRS-S  | 0 <sup>h</sup> |
|                                                              |                                     |                                  |                                                                                                                                                                                  | <b>Disease-related physical</b>   |          |                |
|                                                              | Waiting list +discussion forum, 43  | Measurement<br>5/86 (6%)         |                                                                                                                                                                                  | IBS symptom severity              | GSRS-IBS | - <sup>f</sup> |
|                                                              |                                     |                                  |                                                                                                                                                                                  | <b>Disease-related impact</b>     |          |                |
|                                                              |                                     | disease-specific quality of life | IBS-QOL                                                                                                                                                                          | + <sup>f</sup>                    |          |                |
| Ljótsson et al, 2011a [49]<br><br>(irritable bowel syndrome) | ICBT, 30                            | Intervention<br>7/30 (23%)       | <b>ICBT (10 wks)</b><br>-exposure<br>-mindfulness & acceptance-based techniques<br>-cognitive therapy<br>-behavioral therapy<br>-psychoeducation                                 | <b>General psychological</b>      |          | ITT            |
|                                                              |                                     |                                  |                                                                                                                                                                                  | -                                 | -        | -              |
|                                                              |                                     |                                  |                                                                                                                                                                                  | <b>Disease-related physical</b>   |          |                |
|                                                              | Waiting list + discussion forum, 31 | Measurement<br>11/61 (18%)       |                                                                                                                                                                                  | IBS symptom severity              | GSRS-IBS | - <sup>f</sup> |
|                                                              |                                     |                                  |                                                                                                                                                                                  | <b>Disease-related impact</b>     |          |                |
|                                                              |                                     | disease-specific quality of life | IBS-QOL                                                                                                                                                                          | + <sup>f</sup>                    |          |                |
| Lorig et al, 2006 [53]<br><br>(heterogeneous)                | ICBT, 457                           | Intervention<br>104/457 (23%)    | <b>ICBT (6 wks)</b><br>-psychoeducation<br>-physical exercise<br>-cognitive therapy<br>-stress management<br>-improving coping skills<br>-relaxation<br>-problem solving         | <b>General psychological</b>      |          | Non-ITT        |
|                                                              |                                     |                                  |                                                                                                                                                                                  | -                                 | -        | -              |
|                                                              |                                     |                                  |                                                                                                                                                                                  | <b>Disease-related physical</b>   |          |                |
|                                                              | CAU, 501                            | Measurement<br>175/958 (18%)     |                                                                                                                                                                                  | pain                              | VNS      | - <sup>e</sup> |
|                                                              |                                     |                                  |                                                                                                                                                                                  | fatigue                           | VNS      | - <sup>d</sup> |
|                                                              |                                     |                                  |                                                                                                                                                                                  | <b>Disease-related impact</b>     |          |                |
|                                                              |                                     |                                  |                                                                                                                                                                                  | health distress                   | HDS      | - <sup>d</sup> |
| Lorig et al, 2008 [54]<br><br>(arthritis or fibromyalgia)    | ICBT, 433                           | Intervention<br>123/433 (28%)    | <b>ICBT (6 wks)</b><br>-psychoeducation<br>-physical exercise<br>-cognitive therapy<br>-applied relaxation<br>-stress management<br>-improving coping skills<br>-problem solving | <b>General psychological</b>      |          | ITT            |
|                                                              |                                     |                                  |                                                                                                                                                                                  | -                                 | -        | -              |
|                                                              |                                     |                                  |                                                                                                                                                                                  | <b>Disease-related physical</b>   |          |                |
|                                                              | CAU, 422                            | Measurement<br>214/855 (25%)     |                                                                                                                                                                                  | pain                              | VNS      | - <sup>f</sup> |
|                                                              |                                     |                                  |                                                                                                                                                                                  | fatigue                           | VNS      | 0 <sup>c</sup> |
|                                                              |                                     |                                  |                                                                                                                                                                                  | <b>Disease-related impact</b>     |          |                |
|                                                              |                                     |                                  |                                                                                                                                                                                  | health distress                   | HDS      | - <sup>f</sup> |

|                                                    |                                 |                              |                                                                                                                                                                                  |                                 |                                 |                |
|----------------------------------------------------|---------------------------------|------------------------------|----------------------------------------------------------------------------------------------------------------------------------------------------------------------------------|---------------------------------|---------------------------------|----------------|
| Lorig et al, 2010 [52]<br><br>(type 2 diabetes)    | ICBT, 259                       | Intervention<br>96/491 (20%) | <b>ICBT (6 wks)</b><br>-stress management<br>-improving coping skills<br>-physical exercise<br>-applied relaxation<br>-problem solving<br>-cognitive therapy<br>-psychoeducation | <b>General psychological</b>    |                                 | ITT            |
|                                                    | ICBT + email reinforcement, 232 | Measurement<br>116/761 (15%) |                                                                                                                                                                                  | depression                      | PHQ                             | 0              |
|                                                    | CAU, 270                        |                              |                                                                                                                                                                                  | <b>Disease-related physical</b> |                                 |                |
|                                                    |                                 |                              | glycemic control                                                                                                                                                                 | A1c                             | 0 <sup>c</sup>                  |                |
|                                                    |                                 |                              | <b>Disease-related impact</b>                                                                                                                                                    |                                 |                                 |                |
|                                                    |                                 |                              | health distress                                                                                                                                                                  | HDS                             | 0                               |                |
| Ström et al, 2000 [55]<br><br>(recurrent headache) | ICBT, 20 <sup>g</sup>           | Intervention<br><i>n.r.</i>  | <b>ICBT (6 wks)</b><br>-applied relaxation<br>-problem solving<br>-improving coping skills                                                                                       | <b>General psychological</b>    |                                 | Non-ITT        |
|                                                    |                                 |                              |                                                                                                                                                                                  | depression                      | BDI                             | 0              |
|                                                    | Waiting list, 25 <sup>g</sup>   | Measurement<br>57/102 (56%)  |                                                                                                                                                                                  | <b>Disease-related physical</b> |                                 |                |
|                                                    |                                 |                              |                                                                                                                                                                                  |                                 | headache index                  | Diary          |
|                                                    |                                 |                              | <b>Disease-related impact</b>                                                                                                                                                    |                                 |                                 |                |
|                                                    |                                 |                              | -                                                                                                                                                                                | -                               | -                               |                |
| Thompson et al, 2010 [56]<br><br>(epilepsy)        | ICBT, 13                        | Intervention<br>7/26 (27%)   | <b>ICBT (8 wks)</b><br>-cognitive therapy<br>-mindfulness & acceptance based techniques<br>-psychoeducation<br>-applied relaxation                                               | <b>General psychological</b>    |                                 | Non-ITT        |
|                                                    | MBCT delivered by phone, 12     | Measurement<br>13/52 (25%)   |                                                                                                                                                                                  | depression                      | BDI                             | - <sup>f</sup> |
|                                                    | CAU waiting list, 27            |                              |                                                                                                                                                                                  |                                 |                                 |                |
|                                                    |                                 |                              |                                                                                                                                                                                  |                                 | <b>Disease-related physical</b> |                |
|                                                    |                                 |                              | -                                                                                                                                                                                | -                               | -                               |                |
|                                                    |                                 |                              | <b>Disease-related impact</b>                                                                                                                                                    |                                 |                                 |                |
|                                                    |                                 |                              | physical health quality of life                                                                                                                                                  | BRFSS                           | 0                               |                |

<sup>a</sup>BDI=Beck Depression Inventory; BPI=Brief Pain Inventory; BRFS=Behavioral Risk Factor Surveillance System; BSI=Brief Symptom Inventory; BSI-GSI=Brief Symptom Inventory - Global Severity Index; CAU=Care as usual; CES-D=Centre for Epidemiologic Studies – Depression; DASS-A=Depression Anxiety Distress Scales - Anxiety; DASS-D=Depression Anxiety Distress Scales - Depression; DASS-S=Depression Anxiety Distress Scales - Stress; GRS=Gastrointestinal Symptom Rating Scale; GRS-IBS=Gastrointestinal Symptom Rating Scale - Irritable Bowel Syndrome; HADS-A=Hospital Anxiety and Depression Scale - Anxiety; HADS-D=Hospital Anxiety and Depression Scale – Depression; HbA1C=Hemoglobin A1C; HDS=Health Distress Scale; IBS=irritable bowel syndrome; IBS-QOL=Irritable Bowel Syndrome Quality of Life Instrument; ICBT=Internet-based cognitive therapy; ITT=intent-to-treat analysis; MADRS-S=Montgomery-Åsberg Depression Rating Scale self-rating; MPI=Multidimensional Pain Inventory; PAID=Problem Areas in Diabetes; PHQ=Patient Health Questionnaire; SF-36=Short Form Health Survey-36; STAI-S=State Trait Anxiety Inventory - State Anxiety; STAI-T=State Trait Anxiety Inventory - Trait Anxiety; TRQ=Tinnitus Reaction Questionnaire; VAS=Visual Analogue Scale; VNS=Visual Numeric Scale.

<sup>b</sup>0 =no statistically significant effects, - =statistically significant effect indicating a reduction in the outcome, + =statistically significant effect showing an increase in the outcome

<sup>c</sup>P≤.1

<sup>d</sup>P<.05

<sup>e</sup>P≤.01

<sup>f</sup>P≤.001

<sup>g</sup> after dropout, pre-dropout sample size not reported

<sup>h</sup>Per-protocol means and SDs are reported in the article (ITT did not affect results, except for non-significance of effect on MADRS-S).
