# Supplementary material for: Internet-Based Cognitive Behavioral Therapy for Patients With Chronic Somatic Conditions: A Meta-Analytic Review
Source: PubMed Central journal article supplement (PMC4004147; doi:10.2196/jmir.2777), 2014-03-27
Supplement: jmir_v16i3e88_app3.pdf [file jmir_v16i3e88_app3.pdf]

Multimedia appendix 3. Study characteristics and post-intervention effects of ICBT for chronic somatic conditions: two-armed studies with an active comparison condition.

| Author, year (population)                              | Condition, N                    | Dropout n (%)            | Treatment content (duration)                                                                                                                                                                   | Outcome                      | Outcome measure <sup>a</sup> | Main effects ICBT <sup>b</sup> | Between group effects <sup>b</sup> |
|--------------------------------------------------------|---------------------------------|--------------------------|------------------------------------------------------------------------------------------------------------------------------------------------------------------------------------------------|------------------------------|------------------------------|--------------------------------|------------------------------------|
| Andersson et al, 2003 [36]<br><br>(recurrent headache) | ICBT + phone, 24                | Intervention 7/24 (29%)  | <b>ICBT (6 wks)</b><br>-applied relaxation<br>-problem solving<br>-cognitive therapy<br>-psychoeducation<br>-improving coping skills                                                           | <b>General psychological</b> |                              | Non-ITT                        |                                    |
|                                                        |                                 |                          |                                                                                                                                                                                                | depression                   | HADS-D                       | - <sup>c</sup>                 | 0                                  |
|                                                        |                                 |                          |                                                                                                                                                                                                | anxiety                      | HADS-A                       | 0                              | 0                                  |
|                                                        |                                 |                          |                                                                                                                                                                                                | self-perceived stress        | PSS                          | - <sup>d</sup>                 | 0                                  |
|                                                        | <b>Disease-related physical</b> |                          |                                                                                                                                                                                                |                              |                              |                                |                                    |
|                                                        | headache index                  | Diary                    |                                                                                                                                                                                                | 0                            | 0                            |                                |                                    |
|                                                        | <b>Disease-related impact</b>   |                          |                                                                                                                                                                                                |                              |                              |                                |                                    |
| -                                                      | -                               | -                        | -                                                                                                                                                                                              |                              |                              |                                |                                    |
| Kaldo et al, 2008 [48]<br><br>(tinnitus)               | ICBT, 26                        | Intervention 10/26 (38%) | <b>ICBT (6 wks)</b><br>-applied relaxation<br>-cognitive therapy<br>-behavioral therapy<br>-exposure<br>-stress management<br>-improving coping skills<br>-psychoeducation<br>-problem solving | <b>General psychological</b> |                              | ITT                            |                                    |
|                                                        |                                 |                          |                                                                                                                                                                                                | depression                   | HADS-D                       | - <sup>e</sup>                 | 0                                  |
|                                                        |                                 |                          |                                                                                                                                                                                                | anxiety                      | HADS-A                       | - <sup>h</sup>                 | 0                                  |
|                                                        |                                 |                          |                                                                                                                                                                                                | perceived stress             | VAS                          | 0                              | 0                                  |
|                                                        | <b>Disease-related physical</b> |                          |                                                                                                                                                                                                |                              |                              |                                |                                    |
|                                                        | tinnitus loudness               | VAS                      |                                                                                                                                                                                                | - <sup>h</sup>               | 0                            |                                |                                    |
|                                                        | quality of sleep                | ISI                      |                                                                                                                                                                                                | + <sup>h</sup>               | 0                            |                                |                                    |
|                                                        | <b>Disease-related impact</b>   |                          |                                                                                                                                                                                                |                              |                              |                                |                                    |
| tinnitus-related distress and annoyance                | TRQ                             | - <sup>h</sup>           | 0                                                                                                                                                                                              |                              |                              |                                |                                    |
| Group-based CBT, 25                                    | Measurement 2/51 (4%)           |                          |                                                                                                                                                                                                |                              |                              |                                |                                    |
|                                                        |                                 |                          |                                                                                                                                                                                                |                              |                              |                                |                                    |

|                                                              |                                                      |                           |                                                                                                                              |                                 |                |                  |                  |
|--------------------------------------------------------------|------------------------------------------------------|---------------------------|------------------------------------------------------------------------------------------------------------------------------|---------------------------------|----------------|------------------|------------------|
| Ljótsson et al, 2011b [51]<br><br>(irritable bowel syndrome) | ICBT, 98                                             | Intervention<br>1/98 (1%) | <b>ICBT (10 wks)</b><br>-mindfulness & acceptance-based techniques<br>-exposure<br>-behavioral therapy<br>-cognitive therapy | <b>General psychological</b>    |                | ITT              |                  |
|                                                              |                                                      |                           |                                                                                                                              | depression                      | HADS-D         | - <sup>e</sup>   | 0                |
|                                                              |                                                      |                           |                                                                                                                              | anxiety                         | HADS-A         | - <sup>e</sup>   | 0                |
|                                                              | self-perceived stress                                | PSS                       | - <sup>c</sup>                                                                                                               | 0                               |                |                  |                  |
|                                                              | Internet stress management (no exposure content), 97 | Measurement<br>4/195 (2%) | <b>Stress Management (10 wks)</b><br>-stress management<br>-improving coping skills<br>-problem solving<br>-psychoeducation  | <b>Disease-related physical</b> |                |                  |                  |
|                                                              |                                                      |                           |                                                                                                                              | IBS symptom severity            | GSRS-IBS       | - <sup>e</sup>   | - <sup>e,f</sup> |
|                                                              |                                                      |                           |                                                                                                                              | <b>Disease-related impact</b>   |                |                  |                  |
| disease-specific quality of life                             |                                                      |                           |                                                                                                                              | IBS-QOL                         | + <sup>e</sup> | - <sup>e,f</sup> |                  |

<sup>a</sup>GSRS-IBS=Gastrointestinal Symptom Rating Scale – Irritable Bowel Syndrome; HADS-A=Hospital Anxiety and Depression Scale – Anxiety; HADS-D=Hospital Anxiety and Depression Scale – Depression; IBS-QOL=Irritable Bowel Syndrome Quality of Life Instrument; ICBT = internet-based cognitive behavioral therapy; ISI=Insomnia Severity Index; ITT=intent-to-treat analysis; PSS=Perceived Stress Scale; TRQ=Tinnitus Reaction Questionnaire; VAS=Visual Analogue Scale.

<sup>b</sup>0 =no statistically significant effects, – =statistically significant effect indicating a reduction in the outcome, + =statistically significant effect showing an increase in the outcome.

<sup>c</sup>P< .05

<sup>d</sup>P≤.01

<sup>e</sup>P≤.001

<sup>f</sup>Favoring ICBT

<sup>g</sup>Only for the Internet condition

<sup>h</sup>P value not reported
