# Supplementary material for: Internet-Based Cognitive Behavioral Therapy for Patients With Chronic Somatic Conditions: A Meta-Analytic Review
Source: J Med Internet Res. 2014 Mar 27;16(3):e88. doi: 10.2196/jmir.2777 (PMC4004147; doi:10.2196/jmir.2777)
Supplement: Supplementary file 4 [file jmir_v16i3e88_app4.pdf]

Multimedia appendix 4. Study characteristics and between-group post-intervention effects of ICBT for chronic somatic conditions: three-armed studies with two active treatment conditions and one passive control condition.

| Author, year (population)                                                        | Condition, N                                                        | Dropout n (%)            | Treatment content (duration)                                                                                                                                                           | Outcome                      | Outcome measure <sup>a</sup> | Comparison          | Between group effects <sup>b</sup> |
|----------------------------------------------------------------------------------|---------------------------------------------------------------------|--------------------------|----------------------------------------------------------------------------------------------------------------------------------------------------------------------------------------|------------------------------|------------------------------|---------------------|------------------------------------|
| Ghahari et al, 2010 [44]<br><br>(fatigued patients with neurological conditions) | ICBT, 34<br><br>Online self-management, 28<br><br>Care as usual, 33 | Intervention 10/34 (29%) | <b>ICBT (7 wks)</b><br>-stress management<br>-improving coping skills<br>-psychoeducation<br>-cognitive therapy                                                                        | <b>General psychological</b> |                              |                     | ITT                                |
|                                                                                  |                                                                     |                          |                                                                                                                                                                                        |                              |                              | ICBT - control      | 0                                  |
|                                                                                  |                                                                     |                          |                                                                                                                                                                                        | depression                   | DASS-D                       | Info only - control | 0                                  |
|                                                                                  |                                                                     |                          |                                                                                                                                                                                        |                              | ICBT - info only             | 0                   |                                    |
|                                                                                  |                                                                     |                          |                                                                                                                                                                                        |                              | ICBT - control               | 0                   |                                    |
|                                                                                  | anxiety                                                             |                          |                                                                                                                                                                                        | DASS-A                       | Info only - control          | 0                   |                                    |
|                                                                                  |                                                                     |                          |                                                                                                                                                                                        |                              | ICBT - info only             | 0                   |                                    |
|                                                                                  |                                                                     | Measurement 10/95 (11%)  | <b>Online self-management (7 wks)</b><br>-stress management<br>-improving coping skills<br>-psychoeducation                                                                            |                              |                              | ICBT - control      | 0                                  |
|                                                                                  | stress                                                              |                          |                                                                                                                                                                                        | DASS-S                       | Info only - control          | 0                   |                                    |
|                                                                                  |                                                                     |                          |                                                                                                                                                                                        |                              | ICBT - info only             | 0                   |                                    |
|                                                                                  | <b>Disease-related physical</b>                                     |                          |                                                                                                                                                                                        |                              |                              |                     |                                    |
|                                                                                  | –                                                                   |                          |                                                                                                                                                                                        | –                            | –                            | –                   |                                    |
|                                                                                  | <b>Disease-related impact</b>                                       |                          |                                                                                                                                                                                        |                              |                              |                     |                                    |
|                                                                                  | –                                                                   |                          |                                                                                                                                                                                        | –                            | –                            | –                   |                                    |
| Hedborg & Muhr, 2011 [45]<br><br>(migraine)                                      | ICBT, 28<br><br>ICBT+ massage, 27<br><br>Control, 28                | Intervention 6/55 (11%)  | <b>ICBT (6 months)</b><br>-stress management<br>-improving coping skills<br>-applied relaxation<br>-cognitive therapy<br>-physical exercise<br>-behavioral therapy<br>-psychoeducation | <b>General psychological</b> |                              |                     | ITT                                |
|                                                                                  |                                                                     |                          |                                                                                                                                                                                        |                              |                              | ICBT+ - control     | 0                                  |
|                                                                                  |                                                                     |                          |                                                                                                                                                                                        | depression                   | MADRS-S                      | ICBT - control      | 0                                  |
|                                                                                  |                                                                     |                          |                                                                                                                                                                                        |                              | ICBT + - ICBT                | 0                   |                                    |
|                                                                                  | <b>Disease-related physical</b>                                     |                          |                                                                                                                                                                                        |                              |                              |                     |                                    |
|                                                                                  |                                                                     |                          |                                                                                                                                                                                        | ICBT + - control             | – <sup>c</sup>               |                     |                                    |
|                                                                                  | migraine frequency                                                  | Diary                    |                                                                                                                                                                                        | ICBT - control               | – <sup>c</sup>               |                     |                                    |
|                                                                                  |                                                                     |                          |                                                                                                                                                                                        | ICBT + - ICBT                | 0                            |                     |                                    |
|                                                                                  | <b>Disease-related impact</b>                                       |                          |                                                                                                                                                                                        |                              |                              |                     |                                    |
|                                                                                  | –                                                                   | –                        |                                                                                                                                                                                        | –                            | –                            |                     |                                    |

|                                              |                      |                             |                                                                                                                                                                                                |                                 |        |                |                |
|----------------------------------------------|----------------------|-----------------------------|------------------------------------------------------------------------------------------------------------------------------------------------------------------------------------------------|---------------------------------|--------|----------------|----------------|
| Hesser et al, 2012<br>[46]<br><br>(tinnitus) | ICBT, 32             | Intervention<br>10/67 (15%) | <b>ICBT (8 wks)</b><br>-applied relaxation<br>-cognitive therapy<br>-behavioral therapy<br>-exposure<br>-stress management<br>-improving coping skills<br>-psychoeducation<br>-problem solving | <b>General psychological</b>    |        |                | ITT            |
|                                              |                      |                             |                                                                                                                                                                                                |                                 |        | ICBT - control | 0              |
|                                              |                      |                             |                                                                                                                                                                                                | depression                      | HADS-D | IACB - control | — <sup>d</sup> |
|                                              |                      |                             |                                                                                                                                                                                                |                                 |        | ICBT - IACT    | 0              |
|                                              |                      |                             |                                                                                                                                                                                                |                                 |        | ICBT - control | — <sup>d</sup> |
|                                              |                      |                             |                                                                                                                                                                                                | anxiety                         | HADS-A | IACB - control | — <sup>c</sup> |
|                                              |                      |                             |                                                                                                                                                                                                |                                 |        | ICBT - IACT    | 0              |
|                                              |                      |                             |                                                                                                                                                                                                |                                 |        | ICBT - control | 0              |
|                                              | Discussion forum, 32 | Measurement<br>4/99 (4%)    | <b>IACB (8 wks)</b><br>-mindfulness & acceptance-based techniques<br>-behavioral therapy<br>-cognitive therapy<br>-psychoeducation                                                             | stress                          | PSS    | IACB - control | — <sup>d</sup> |
|                                              |                      |                             |                                                                                                                                                                                                |                                 |        | ICBT - IACT    | 0              |
|                                              |                      |                             |                                                                                                                                                                                                | <b>Disease-related physical</b> |        |                |                |
|                                              |                      |                             |                                                                                                                                                                                                |                                 |        | ICBT - control | 0              |
|                                              |                      |                             |                                                                                                                                                                                                | sleep quality                   | ISI    | IACB - control | 0              |
|                                              |                      |                             |                                                                                                                                                                                                |                                 |        | ICBT - IACT    | 0              |
|                                              |                      |                             |                                                                                                                                                                                                | <b>Disease-related impact</b>   |        |                |                |
|                                              |                      |                             |                                                                                                                                                                                                | —                               | —      | —              | —              |

<sup>a</sup>DASS-A=Depression Anxiety Distress Scales - Anxiety; DASS-D=Depression Anxiety Distress Scales - Depression; DASS-S=Depression Anxiety Distress Scales - Stress; HADS-A=Hospital Anxiety and Depression Scale - Anxiety; HADS-D=Hospital Anxiety and Depression Scale – Depression; IACT=Internet-based acceptance and commitment therapy; ICBT = internet-based cognitive behavioral therapy; ISI=Insomnia Severity Index; ITT=intent-to-treat analysis; MADRS-S=Montgomery-Åsberg Depression Rating Scale self-rating; PSS=Perceived Stress Scale.

<sup>b</sup>0 =no statistically significant effects, – =statistically significant effect indicating a reduction in the outcome, + =statistically significant effect showing an increase in the outcome.

<sup>c</sup> $P < .05$

<sup>d</sup> $P < .01$
